# Supplementary material for: Scientometric and Methodological Analysis of the Recent Literature on the Health-Related Effects of Tomato and Tomato Products
Source: MDPI journal article supplement (doi:10.3390/foods10081905), 2021-08-17
Supplement: s1 [file s1]

# Scientometric and methodological analysis of the recent literature on the health-related effects of tomato and tomato products

Francesca Tilesi <sup>1</sup>, Andrea Lombardi <sup>2</sup> and Andrea Mazzucato <sup>2,\*</sup>

Supplementary figures

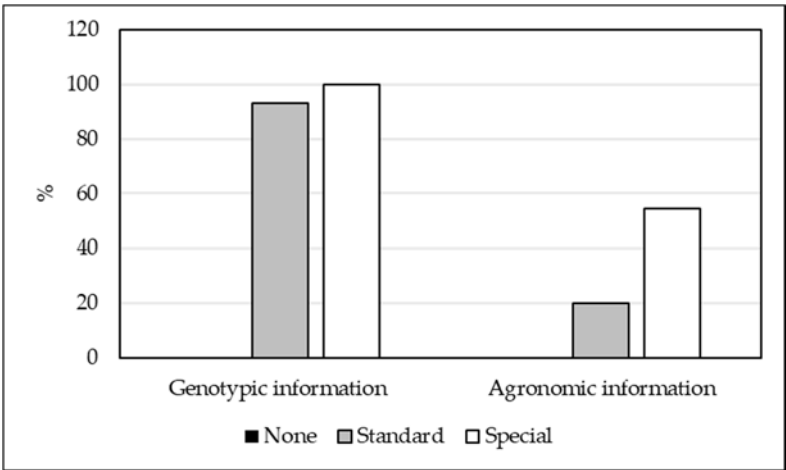

**Figure S1.** Percentage of studies adopting fresh material that reported genotypic and/or agronomic information about the tomato material and the growth conditions used, divided among those referring to undefined material (None), or to standard or special tomatoes.

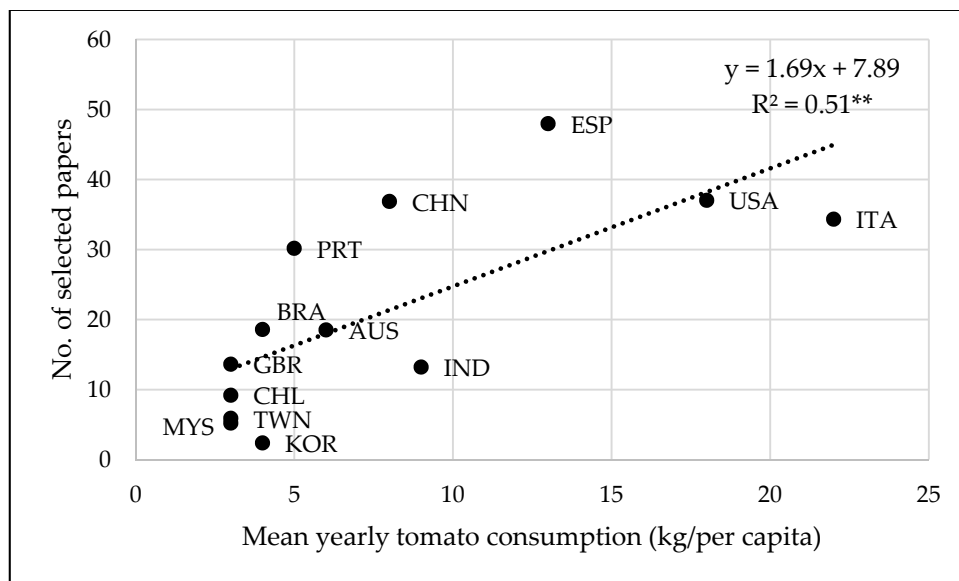

**Figure S2.** Linear regression of the number of selected papers and the yearly per capita tomato consumption [2] including the estimated equation and coefficient of determination.

**\*\*** Indicates that the regression is significant for  $P \leq 0.01$ . Country symbols follow the ISO-3166 Alpha-3 code and are reported in Table 1.
